# Supplementary material
Source: HighWire-hosted journal article supplement (https://erj.ersjournals.com/content/57/6/2003099)
Supplement: inline-supplementary-material-1 [file inline-supplementary-material-1.pdf]

## **Supplement material**

### **Long-term exposure to low-level air pollution and incidence of asthma: the ELAPSE project**

Shuo Liu, Jeanette Therning Jørgensen, Petter Ljungman, Göran Pershagen, Tom Bellander, Karin Leander, Patrik K.E. Magnusson, Debora Rizzuto, Ulla A. Hvidtfeldt, Ole Raaschou-Nielsen, Kathrin Wolf, Barbara Hoffmann, Bert Brunekreef, Maciej Strak, Jie Chen, Amar Mehta, Richard W. Atkinson, Mariska Bauwelinck, Raphaëlle Varraso, Marie-Christine Boutron-Ruault, Jørgen Brandt, Giulia Cesaroni, Francesco Forastiere, Daniela Fecht, John Gulliver, Ole Hertel, Kees de Hoogh, Nicole A.H. Janssen, Klea Katsouyanni, Matthias Ketzel, Jochem O. Klompmaker, Gabriele Nagel, Bente Oftedal, Annette Peters, Anne Tjønneland, Sophia P. Rodopoulou, Evangelia Samoli, Doris Tove Kristoffersen, Torben Sigsgaard, Massimo Stafoggia, Danielle Vienneau, Gudrun Weinmayr, Gerard Hoek, Zorana Jovanovic Andersen

**Correspondence to** Zorana Jovanovic Andersen, University of Copenhagen, Øster Farimagsgade 5, Copenhagen 1014, Denmark. E-mail: zorana.andersen@sund.ku.dk.

## **1. Description of the Three Study Cohorts.**

We included three out of 11 pooled ELAPSE large prospective cohorts into our analyses. One of the cohorts, the CEANS cohort, is composed of four individual Swedish cohorts. The other two study cohorts, the DCH cohort and the DNC cohort, are from Denmark. The DNC cohort includes two parts of participants who were recruited in 1993 or 1999.

### ***1) CEANS, Cardiovascular Effects of Air Pollution and Noise, Sweden: including SDPP, SIXTY, SALT, and SNAC-K.***

#### ***SDPP, the Stockholm Diabetes Preventive Program (SDPP), Sweden***

The Stockholm diabetes prevention program was a population-based prospective study and aimed at investigating the etiology of type 2 diabetes and developing prevention strategies for type 2 diabetes [1]. An initial survey included all men and women in the targeted age group in Stockholm County; for men in four municipalities (Värmdö, Upplands Bro, Tyresö and Sigtuna), and for women these four plus a fifth municipality (Upplands Väsby). All were screened by a questionnaire regarding presence of own diabetes and diabetes in relatives. Subjects with family history of diabetes (FHD) and randomly selected subjects without FHD, all without previously diagnosed diabetes, were invited to a health examination. This baseline study, 1992–1994 for men and 1996–1998 for women, comprised 7,949 subjects, aged 35–56 years, and about 50% had FHD. In the follow-up study 8–10 years later, 2,383 men (2002–2004) and 3,329 women (2004–2006) participated. At the health examinations, both at baseline and follow-up, an extensive questionnaire (information on lifestyle factors, such as physical activity, dietary habits, tobacco use, alcohol consumption, health status, socioeconomic status and psychosocial conditions) was completed. Diabetes heredity was confirmed and measurements of weight, height, hip and waist circumference as well as blood pressure were performed. In addition, an oral glucose tolerance test (OGTT) was made, and blood was sampled at fasting state and 2 hour after glucose intake. Outcomes based on the

Swedish nationwide health registries (such as the myocardial infarction and stroke registries, the cause-of death register, and the national patient register) have been used.

### ***SIXTY, the Cohort of 60-year-olds, Sweden***

The Cohort of 60-year-olds is a study aiming to identify biological and socio-economic risk factors and predictors for cardiovascular diseases [2]. Recruitment took place between August 1997 and March 1999. A random sample of every third man and woman living in Stockholm County, who was born between 1 July 1937 and 30 June 1938, was invited to participate. In total, 4,232 subjects were included. Height, weight, BMI, Waist/Hip ratio and resting ECD, blood pressure and fasting blood samples were taken during a physical examination, while a comprehensive questionnaire was completed, including information on socioeconomic, medical and life-style factors. Outcomes based on the Swedish nationwide health registries (such as the myocardial infarction and stroke registries, the cause-of-death register and the national patient register) have been used.

### ***SALT, the Stockholm Screening Across the Lifespan Twin study, Sweden***

Participants come from two sub-studies of the Swedish Twin Registry (STR) [3]. The Screening Across the Lifespan Twin study (SALT) [4] & TwinGene [5] was set-up to screen all twins born in Sweden before 1958 for the most common complex diseases with a focus on cardiovascular diseases. TwinGene is a sub-study establishing a biobank with DNA and serum from SALT participants. SALT is based on a telephone interview and recruitment took place between 1998 and 2002. Information concerning birth order and weight, zygosity, contact with twin partner and family constellation, diseases, use of medication, occupation, education, life style habits, gender- and age specific (hormone replacement therapy) and memory problems (age > 65 ) was collected. In TwinGene, twins born before 1958 were contacted 2004-2008. Health and medication data were collected from questionnaires. Blood sampling material was mailed to study subjects, who contacted a local health care center for

blood sampling. Information about COPD come from linkages to Swedish nationwide health registries. This investigation on air pollution is restricted to participants living in Stockholm County.

### ***SNAC-K, The Swedish National study of Aging and Care in Kungsholmen, Sweden***

SNAC-K is an ongoing longitudinal study aiming to investigate the ageing process and identify possible preventive strategies to improve health and care in elderly adults [6]. The study population consists of randomly sampled individuals  $\geq 60$  years old and in a central area of Stockholm (Kungsholmen) between March 2001 and June 2004. The sample was stratified for age and year of assessment giving sub-cohorts with 60, 66, 72, 78, 81, 84, 87, 90, 93, 96, and 99+ year olds. Information was collected through social interviews, assessment of physical functioning, clinical examination (incl. geriatric, neurological and physical assessments) as well as cognitive assessment. At baseline, information regarding events prior to the study period was gathered. The follow-up interval is six years for the younger age cohorts, and three years for the older age cohorts (81+). During the follow-up intervals, medical events of all participants are registered through linkage with primary care registry and hospital discharge registry (available for all subjects in Sweden). In case of death, hospital and cause of death registries provide the clinical information, and informant interviews are carried out. The same protocol as for the baseline data collection is used during the follow-up, though only concerning the follow-up period. Website of study: <https://www.snac-k.se>. Any outcomes based on the Swedish nationwide health registries (such as the myocardial infarction and stroke registries, the cause-of-death register and the national patient register) have been used.

### ***2) DCH, Danish Diet, Cancer and Health study, Denmark***

The primary aim of the DCH study is to investigate diet and lifestyle in relation to incidence of cancer and other chronic diseases [7]. Historical residential history of the study

participants is available, which facilitate studies of air pollution and noise. The study enrolled participants in two areas, Copenhagen and Aarhus, Denmark. 160,725 individuals aged 50–64 years were invited to participate between December 1993 and May 1997. Out of the 160,725 people invited, 57,053 were enrolled. On enrolment, each participant completed self-administered questionnaires (in Danish) that included questions on dietary habits, health status, family history of cancer, social factors, reproductive factors, smoking, environmental smoking, and lifestyle habits. Anthropometric measurements including blood pressure and blood samples were also obtained. The DCH cohort is followed up regularly by use of complete nationwide registers hence the loss to follow-up is virtually nil. Data on asthma incidence from the Danish National Patient Registry were used.

### ***3) DNC, Danish Nurse Cohort study, Denmark***

The Danish Nurse Cohort was established in 1993 and includes a total of 28,731 female members of the Danish Nurse Organization who were 44 years of age or older at recruitment in 1993 or 1999 [8]. Inspired by the American Nurses' Health Study, the Danish Nurse Cohort aimed to provide the basis for research into the potential health effects related to use of hormone replacement therapy (HRT) in a European population. In 1993, the cohort was initiated by sending a questionnaire to 23,170 female members of the Danish Nurse Organization who were at least 44 years old at the time. The Danish Nurse Organization includes 95% of all nurses in Denmark. In total, 19,898 nurses accepted an invitation and answered a comprehensive questionnaire on lifestyle (smoking, alcohol consumption, leisure time physical activity, diet, BMI, etc.), occupational characteristics (shift work, work environment, etc.), health, reproductive factors, and other factors. The cohort was reinvestigated in 1999, adding 8,833 nurses (8,344 new nurses who turned 44 in the period 1993–1999 and 489 non-responders from the 1993 who were re-invited).

## 2. Air Pollution Exposure Assessment

Annual average concentrations of PM<sub>2.5</sub>, NO<sub>2</sub>, BC, and warm season O<sub>3</sub> (April through September; the maximum running 8-hour averages) for 2010 were estimated at the study participants' baseline residential addresses with the use of standardized Europe-wide hybrid land use regression (LUR) models [9, 10]. The LUR models incorporated the European Environment Agency (EEA) AirBase routine monitoring data for PM<sub>2.5</sub>, NO<sub>2</sub>, and O<sub>3</sub> and ESCAPE monitoring data for BC. BC was measured by the reflectance of PM<sub>2.5</sub> filters and expressed in absorbance units [9]. Satellite and chemical transport model air pollution estimates, land use, and traffic data were predictors to develop models for annual mean air pollution concentrations. The developed hybrid LUR models were used to create exposure surfaces at a 100 × 100 m spatial scale for exposure assignments to the cohorts. The exposure models performed well in five-fold hold-out validation, explaining a large fraction of spatial variability for PM<sub>2.5</sub> (72%), NO<sub>2</sub> (59%), BC (54%), and O<sub>3</sub> (69%) in the measured annual mean concentrations [9]. Additionally, predictions from the 2010 model correlated highly with models developed for 2000 and 2005 models for (NO<sub>2</sub> and O<sub>3</sub>) and 2013 model for PM<sub>2.5</sub> at the overall European scale, with squared correlations (R<sup>2</sup>) larger than 76% [9].

We also estimated pollutant concentrations for each year from recruitment to the end of follow-up using back-extrapolation to 1990. We back-extrapolated by using a chemical transport and dispersion model, the Danish Eulerian Hemispheric Model (DEHM) [11], which calculated monthly average concentrations across Europe at 26 × 26 km resolution. The rationale to use DEHM for back-extrapolation is the consistent availability of estimates across Europe for the full study period for all pollutants. In contrast, routine monitoring data were less consistent, not available for BC and only available from about 2008 for PM<sub>2.5</sub>. Residential address histories for each year were incorporated in the back-extrapolation, such

that both changes in air pollution spatial patterns and moving residential address were accounted for. For application to the cohorts, we calculated population weighted average concentrations at the study area level, allowing different spatial trends within Europe. We back-extrapolated concentrations for all pollutants using both an absolute difference and a ratio method with 2010 as the reference. With the absolute difference method the concentration difference between a year and 2010 from the DEHM model is added to all cohort exposures for that year in the same NUTS-1 area. With the ratio method the concentration ratio between a year and 2010 from the DEHM model is used to multiply all cohort exposure for that year in the same NUTS-1 area. In case of higher concentrations in the past, the ratio method therefore increases the contrast in cohort exposures.

## References

1. Eriksson AK, Ekblom A, Granath F, Hilding A, Efendic S, Ostenson CG. Psychological distress and risk of pre-diabetes and Type 2 diabetes in a prospective study of Swedish middle-aged men and women. *Diabetic medicine : a journal of the British Diabetic Association* 2008; 25(7): 834-842.
2. Wändell PE, Wajngot A, de Faire U, Hellénus ML. Increased prevalence of diabetes among immigrants from non-European countries in 60-year-old men and women in Sweden. *Diabetes & metabolism* 2007; 33(1): 30-36.
3. Zagai U, Lichtenstein P, Pedersen NL, Magnusson PKE. The Swedish Twin Registry: Content and Management as a Research Infrastructure. *Twin research and human genetics : the official journal of the International Society for Twin Studies* 2019; 22(6): 672-680.
4. Lichtenstein P, Sullivan PF, Cnattingius S, Gatz M, Johansson S, Carlström E, Björk C, Svartengren M, Wolk A, Klareskog L, de Faire U, Schalling M, Palmgren J, Pedersen NL. The Swedish Twin Registry in the third millennium: an update. *Twin research and human genetics : the official journal of the International Society for Twin Studies* 2006; 9(6): 875-882.
5. Magnusson PK, Almqvist C, Rahman I, Ganna A, Viktorin A, Walum H, Halldner L, Lundström S, Ullén F, Långström N, Larsson H, Nyman A, Gumpert CH, Råstam M, Anckarsäter H, Cnattingius S, Johannesson M, Ingelsson E, Klareskog L, de Faire U, Pedersen NL, Lichtenstein P. The Swedish Twin Registry: establishment of a biobank and other recent developments. *Twin research and human genetics : the official journal of the International Society for Twin Studies* 2013; 16(1): 317-329.
6. Lagergren M, Fratiglioni L, Hallberg IR, Berglund J, Elmståhl S, Hagberg B, Holst G, Rennemark M, Sjölund BM, Thorslund M, Wiberg I, Winblad B, Wimo A. A longitudinal study integrating population, care and social services data. The Swedish National study on Aging and Care (SNAC). *Aging clinical and experimental research* 2004; 16(2): 158-168.
7. Tjønneland A, Olsen A, Boll K, Stripp C, Christensen J, Engholm G, Overvad K. Study design, exposure variables, and socioeconomic determinants of participation in Diet, Cancer and Health: a population-based prospective cohort study of 57,053 men and women in Denmark. *Scandinavian journal of public health* 2007; 35(4): 432-441.
8. Hundrup YA, Simonsen MK, Jorgensen T, Obel EB. Cohort profile: the Danish nurse cohort. *International journal of epidemiology* 2012; 41(5): 1241-1247.
9. de Hoogh K, Chen J, Gulliver J, Hoffmann B, Hertel O, Ketzel M, Bauwelinck M, van Donkelaar A, Hvidtfeldt UA, Katsouyanni K, Klompmaker J, Martin RV, Samoli E, Schwartz PE, Stafoggia M, Bellander T, Strak M, Wolf K, Vienneau D, Brunekreef B, Hoek G. Spatial PM<sub>2.5</sub>, NO<sub>2</sub>, O<sub>3</sub> and BC models for Western Europe - Evaluation of spatiotemporal stability. *Environment international* 2018; 120: 81-92.
10. de Hoogh K, Gulliver J, Donkelaar AV, Martin RV, Marshall JD, Bechle MJ, Cesaroni G, Pradas MC, Dedele A, Eeftens M, Forsberg B, Galassi C, Heinrich J, Hoffmann B, Jacquemin B, Katsouyanni K, Korek M, Kunzli N, Lindley SJ, Lepeule J, Meleux F, de Nazelle A, Nieuwenhuijsen M, Nystad W, Raaschou-Nielsen O, Peters A, Peuch VH, Rouil L, Udvardy O, Slama R, Stempfelet M, Stephanou EG, Tsai MY, Yli-Tuomi T, Weinmayr G, Brunekreef B, Vienneau D, Hoek G. Development of West-European PM<sub>2.5</sub> and NO<sub>2</sub> land use regression models incorporating satellite-derived and chemical transport modelling data. *Environmental research* 2016; 151: 1-10.
11. Brandt J, Silver JD, Frohn LM, Geels C, Gross A, Hansen AB, Hansen KM, Hedegaard GB, Skjøth CA, Villadsen H, Zare A, Christensen JH. An integrated model study



for Europe and North America using the Danish Eulerian Hemispheric Model with focus on intercontinental transport of air pollution. *Atmospheric Environment* 2012; 53: 156-176.

12. McDonnell WF, Abbey DE, Nishino N, Lebowitz MD. Long-term ambient ozone concentration and the incidence of asthma in nonsmoking adults: the AHSMOG Study. *Environmental research* 1999; 80(2 Pt 1): 110-121.

13. Jacquemin B, Sunyer J, Forsberg B, Aguilera I, Briggs D, Garcia-Esteban R, Gotschi T, Heinrich J, Jarvholm B, Jarvis D, Vienneau D, Kunzli N. Home outdoor NO<sub>2</sub> and new onset of self-reported asthma in adults. *Epidemiology (Cambridge, Mass)* 2009; 20(1): 119-126.

14. Künzli N, Bridevaux PO, Liu LJ, Garcia-Esteban R, Schindler C, Gerbase MW, Sunyer J, Keidel D, Rochat T. Traffic-related air pollution correlates with adult-onset asthma among never-smokers. *Thorax* 2009; 64(8): 664-670.

15. Modig L, Toren K, Janson C, Jarvholm B, Forsberg B. Vehicle exhaust outside the home and onset of asthma among adults. *The European respiratory journal* 2009; 33(6): 1261-1267.

16. Andersen ZJ, Bonnelykke K, Hvidberg M, Jensen SS, Ketzel M, Loft S, Sorensen M, Tjønneland A, Overvad K, Raaschou-Nielsen O. Long-term exposure to air pollution and asthma hospitalisations in older adults: a cohort study. *Thorax* 2012; 67(1): 6-11.

17. Young MT, Sandler DP, DeRoo LA, Vedal S, Kaufman JD, London SJ. Ambient air pollution exposure and incident adult asthma in a nationwide cohort of U.S. women. *American journal of respiratory and critical care medicine* 2014; 190(8): 914-921.

18. Jacquemin B, Siroux V, Sanchez M, Carsin AE, Schikowski T, Adam M, Bellisario V, Buschka A, Bono R, Brunekreef B, Cai Y, Cirach M, Clavel-Chapelon F, Declercq C, de Marco R, de Nazelle A, Ducret-Stich RE, Ferretti VV, Gerbase MW, Hardy R, Heinrich J, Janson C, Jarvis D, Al Kanaani Z, Keidel D, Kuh D, Le Moual N, Nieuwenhuijsen MJ, Marcon A, Modig L, Pin I, Rochat T, Schindler C, Sugiri D, Stempfelet M, Temam S, Tsai MY, Varraso R, Vienneau D, Vierkötter A, Hansell AL, Kramer U, Probst-Hensch NM, Sunyer J, Kunzli N, Kauffmann F. Ambient air pollution and adult asthma incidence in six European cohorts (ESCAPE). *Environmental health perspectives* 2015; 123(6): 613-621.

19. Fisher JA, Puett RC, Hart JE, Camargo CA, Jr., Varraso R, Yanosky JD, Laden F. Particulate matter exposures and adult-onset asthma and COPD in the Nurses' Health Study. *The European respiratory journal* 2016; 48(3): 921-924.

20. Weichenthal S, Bai L, Hatzopoulou M, Van Ryswyk K, Kwong JC, Jerrett M, van Donkelaar A, Martin RV, Burnett RT, Lu H, Chen H. Long-term exposure to ambient ultrafine particles and respiratory disease incidence in Toronto, Canada: a cohort study. *Environmental health : a global access science source* 2017; 16(1): 64.

21. Salimi F, Morgan G, Rolfe M, Samoli E, Cowie CT, Hanigan I, Knibbs L, Cope M, Johnston FH, Guo Y, Marks GB, Heyworth J, Jalaludin B. Long-term exposure to low concentrations of air pollutants and hospitalisation for respiratory diseases: A prospective cohort study in Australia. *Environment international* 2018; 121(Pt 1): 415-420.

**Table S1.** Overview of studies on air pollution and asthma incidence in adults.

| Author, year                   | Cohort/Study                                                        | Sample Size (N)     | Asthma incidence definition                                                                       | Pollutant (mean levels)                              | Effect estimates                                                                 |
|--------------------------------|---------------------------------------------------------------------|---------------------|---------------------------------------------------------------------------------------------------|------------------------------------------------------|----------------------------------------------------------------------------------|
| McDonnell et al.,<br>1999 [12] | The Ahsmog Study, California, USA,                                  | 3,091 non-smokers   | Self-reported asthma diagnosed<br>by a doctor                                                     | O <sub>3</sub> (46.5 ppb)                            | RR (95% CI):<br>M: 2.09 (1.03–4.16) per 27 ppb<br>F: 0.86 (0.58–1.26) per 27 ppb |
| Jacquemin et al.,<br>2009 [13] | European Respiratory Health Survey<br>(ECRHS), 17 European cities   | 4,185               | Self-reported ever asthma<br>diagnosed by a doctor                                                | NO <sub>2</sub> (median: 27.7<br>µg/m <sup>3</sup> ) | OR (95% CI):<br>1.43 (1.02–2.01) per 10 µg/m <sup>3</sup>                        |
| Künzli et al.,<br>2009 [14]    | The SAPALDIA cohort, Switzerland                                    | 2,725 never-smokers | Self-reported doctor-diagnosed<br>asthma                                                          | dTPM <sub>10</sub> (-0.59 µg/m <sup>3</sup> )        | HR (95% CI):<br>1.30 (1.05–1.61) per 1 µg/m <sup>3</sup>                         |
| Modig et al.,<br>2009 [15]     | The Respiratory Health in Northern<br>Europe (RHINE) cohort, Sweden | 3,609               | Self-reported asthma with<br>questionnaire                                                        | NO <sub>2</sub> (17.9 µg/m <sup>3</sup> )            | OR (95% CI):<br>1.54 (1.00–2.36) per 10 µg/m <sup>3</sup>                        |
| Andersen et al.,<br>2012 [16]  | The Diet, Cancer and Health cohort,<br>Denmark                      | 57,053              | Hospital contact (in-, outpatient,<br>or emergency) primary discharge<br>diagnoses ICD-10: J45–46 | NO <sub>2</sub> (median: 15.2 µg/m <sup>3</sup> )    | HR (95% CI):<br>1.10 (1.01–1.20) per 5.8 µg/m <sup>3</sup>                       |

|                                  |                                                                                      |                                                 |                                                                                                                           |                                                                                                                                                                                                                                                 |                                                                                                                                                                  |
|----------------------------------|--------------------------------------------------------------------------------------|-------------------------------------------------|---------------------------------------------------------------------------------------------------------------------------|-------------------------------------------------------------------------------------------------------------------------------------------------------------------------------------------------------------------------------------------------|------------------------------------------------------------------------------------------------------------------------------------------------------------------|
| Young et al.,<br>2014 [17]       | The Sister Study, USA                                                                | 50,884 women<br>(sisters with breast<br>cancer) | Self-reported doctor diagnosed<br>asthma                                                                                  | NO <sub>2</sub> (median: 9.3 ppb)<br>PM <sub>2.5</sub> (median 10.8<br>µg/m <sup>3</sup> )                                                                                                                                                      | OR (95% CI):<br>1.12 (0.96–1.30) per 5.8 ppb<br>1.20 (0.99–1.46) per 3.6 µg/m <sup>3</sup>                                                                       |
| Jacquemin et al.,<br>2015 [18]   | The European Study of Cohorts for<br>Air Pollution Effects (ESCAPE), six<br>cohorts  | 23,704 adults                                   | Self-reported ever asthma<br>diagnosed by a doctor, breathless<br>while wheezing, asthma attacks,<br>or asthma medication | NO <sub>2</sub> (mean range 22–31<br>µg/m <sup>3</sup> by cohort)<br>PM <sub>2.5</sub> (mean range 10–18<br>µg/m <sup>3</sup> by cohort)<br>PM <sub>2.5</sub> absorbance ( mean<br>range 1.0–2.1 10 <sup>-5</sup> m <sup>-1</sup> by<br>cohort) | OR (95% CI):<br>1.10 (0.99–1.21) per 10 µg/m <sup>3</sup><br>1.04 (0.88–1.23) per 5 µg/m <sup>3</sup><br>1.06 (0.95–1.19) per 1 10 <sup>-5</sup> m <sup>-1</sup> |
| Fisher et al.,<br>2016 [19]      | The Nurses' Health Study, USA                                                        | 121,701 female<br>nurses                        | Self-reported physician-<br>diagnosed asthma and use of<br>asthma medication                                              | PM <sub>2.5</sub> (14.2 µg/m <sup>3</sup> )                                                                                                                                                                                                     | HR (95% CI):<br>0.90 (0.73–1.12) per 10 µg/m <sup>3</sup>                                                                                                        |
| Weichenthal et<br>al., 2017 [20] | The Ontario Population Health and<br>Environment Cohort (ONPHEC),<br>Toronto Canada, | 1,100,000                                       | Ontario Asthma Surveillance<br>System (physician insurance                                                                | NO <sub>2</sub> (21.4 ppb)<br>PM <sub>2.5</sub> (10.9 µg/m <sup>3</sup> )<br>UFPs (28,473 count/cm <sup>3</sup> )                                                                                                                               | HR (95% CI):<br>1.03 (1.02–1.05) per 4.1 ppb<br>1.02 (1.00–1.04) per 3.2 µg/m <sup>3</sup>                                                                       |

|                             |                                                           |         |                                                              |                                                                                         |                                                                                                      |
|-----------------------------|-----------------------------------------------------------|---------|--------------------------------------------------------------|-----------------------------------------------------------------------------------------|------------------------------------------------------------------------------------------------------|
|                             |                                                           |         | claims, hospital admissions and medication data): ICD-9: 493 |                                                                                         | 1.00 (1.00–1.01) per 10,097 count/cm <sup>3</sup>                                                    |
| Salimi et al.,<br>2018 [21] | The Sax Institute's 45 and Up Study,<br>Sydney, Australia | 100,084 | Primary diagnosis of<br>hospitalization ICD-10: J45–46       | NO <sub>2</sub> (17.5 µg/m <sup>3</sup> )<br>PM <sub>2.5</sub> (4.5 µg/m <sup>3</sup> ) | HR (95% CI):<br>1.03 (0.88–1.19) per 5 µg/m <sup>3</sup><br>1.08 (0.89–1.30) per 1 µg/m <sup>3</sup> |

PM<sub>2.5</sub>, particulate matter with diameter < 2.5 µm; dTPM<sub>10</sub>, the difference in traffic-related particulate matter with diameter < 10 µm; NO<sub>2</sub>, nitrogen dioxide; BC, black carbon; O<sub>3</sub>, ozone; HR, hazard ratio; OR, odds ratio; CI, confidence interval; SAPALDIA, The Swiss Cohort Study on Air Pollution and Lung Diseases in Adults;

Unit conversion for pollutant concentration, for NO<sub>2</sub>: 1 ppb = 1.88 µg/m<sup>3</sup>; for O<sub>3</sub>: 1 ppb = 2.00 µg/m<sup>3</sup>.

**Table S2.** Characteristics of participants by cohorts and adult-onset asthma status at baseline based on the number of observations in Model 3

| Characteristic at baseline*          | All cohorts (N=98,326) |              |          | DCH (N=52,961) |              |            | DNC (N=24,978)  |               |          |                |              |          |
|--------------------------------------|------------------------|--------------|----------|----------------|--------------|------------|-----------------|---------------|----------|----------------|--------------|----------|
|                                      |                        |              |          |                |              |            | 1993 (N=16,937) |               |          | 1999 (N=8,041) |              |          |
|                                      | Total                  | No<br>asthma | Asthma   | Total          | No<br>asthma | Asthma     | Total           | No<br>asthma  | Asthma   | Total          | No<br>asthma | Asthma   |
| Baseline period                      | 1992–2004              |              |          | 1993–1997      |              |            | 1993            |               |          | 1999           |              |          |
| End of follow-up                     | 2011, 2015             |              |          | 2015           |              |            | 2015            |               |          | 2015           |              |          |
| Person-years at risk, N              | 1,634,458              | 1,601,795    | 32,664   | 928,404        | 918,007      | 10,397     | 327,563         | 324,095       | 3,468    | 126,658        | 125,361      | 1,298    |
| Follow-up time, years<br>(Mean ± SD) | 16.6±5.2               | 16.8±5.0     | 8.9±5.8  | 17.5±4.7       | 17.7±4.5     | 9.1±5.9    | 19.3±5.6        | 19.5±5.4      | 9.9±6.6  | 15.8±2.4       | 15.9±2.1     | 8.7±5.0  |
| Number of observations               | 98,326                 | 96,361       | 1,965    | 52,961         | 51,813       | 1,148      | 16,937          | 16,585        | 352      | 8,041          | 7,892        | 149      |
| Asthma incidence rate                | 2.0%                   |              |          | 2.2%           |              |            | 2.1%            |               |          | 1.9%           |              |          |
| Age, years (Mean ± SD)               | 55.8±7.5               | 55.8±7.5     | 55.4±6.7 | 56.6±4.4       | 56.6±4.4     | 56.8±4.4   | 56.2±8.4        | 56.2±8.4      | 54.2±7.6 | 47.9±4.2       | 47.9±4.2     | 47.9±3.7 |
| <b>Age categories, N (%)</b>         |                        |              |          |                |              |            |                 |               |          |                |              |          |
| < 65 years old                       | 91,318                 | 89,462       | 1,856    | 52,335         | 51,203       | 1,132 (99) | 14,318          | 14,002        | 316 (90) | 7,914          | 7,767        | 147 (99) |
|                                      | (93)                   | (93)         | (94)     | (99)           | (99)         |            | (85)            | (84)          |          | (98)           | (98)         |          |
| ≥ 65 years old                       | 7,008 (7)              | 6,899 (7)    | 109 (6)  | 626 (1)        | 610 (1)      | 16 (1)     | 2,619<br>(15)   | 2,583<br>(16) | 36 (10)  | 127 (2)        | 125 (2)      | 2 (1)    |

|                                    |                |                |               |                |                |          |                 |                 |              |                |                |              |
|------------------------------------|----------------|----------------|---------------|----------------|----------------|----------|-----------------|-----------------|--------------|----------------|----------------|--------------|
| Female, N (%)                      | 64,492<br>(66) | 63,073<br>(65) | 1,419<br>(72) | 27,732<br>(52) | 27,023<br>(52) | 709 (62) | 16,937<br>(100) | 16,585<br>(100) | 352<br>(100) | 8,041<br>(100) | 7,892<br>(100) | 149<br>(100) |
| BMI, kg/m <sup>2</sup> (Mean ± SD) | 25.3±4.0       | 25.3±4.0       | 25.9±4.4      | 26.0±4.1       | 26.0±4.1       | 26.4±4.3 | 23.6±3.5        | 23.6±3.4        | 24.3±4.2     | 23.9±3.6       | 23.9±3.6       | 24.6±3.9     |
| <b>BMI, WHO categories, N (%)</b>  |                |                |               |                |                |          |                 |                 |              |                |                |              |
| <18.5                              | 1,298 (1)      | 1,273 (1)      | 25 (1)        | 416 (1)        | 404 (1)        | 12 (1)   | 495 (3)         | 484 (3)         | 11 (3)       | 139 (2)        | 138 (2)        | 1 (1)        |
| 18.5–24.9                          | 49,901<br>(51) | 49,007<br>(51) | 894 (45)      | 22,893<br>(43) | 22,436<br>(43) | 457 (40) | 11,688<br>(69)  | 11,467<br>(69)  | 221 (63)     | 5,492<br>(68)  | 5,400<br>(68)  | 92 (62)      |
| 25.0–29.9                          | 35,604<br>(36) | 34,867<br>(36) | 737 (38)      | 22,013<br>(42) | 21,536<br>(42) | 477 (42) | 3,875<br>(23)   | 3,790<br>(23)   | 85 (24)      | 1,875<br>(23)  | 1,832<br>(23)  | 43 (29)      |
| ≥30.0                              | 11,523<br>(12) | 11,214<br>(12) | 309 (16)      | 7,639 (14)     | 7,437 (14)     | 202 (18) | 879 (5)         | 844 (5)         | 35 (10)      | 535 (7)        | 522 (7)        | 13 (9)       |
| <b>Smoking status, N (%)</b>       |                |                |               |                |                |          |                 |                 |              |                |                |              |
| Current smoker                     | 32,398<br>(33) | 31,842<br>(33) | 556 (28)      | 19,218<br>(36) | 18,869<br>(36) | 349 (30) | 6,357<br>(38)   | 6,247<br>(38)   | 110 (31)     | 2,303<br>(29)  | 2,263<br>(29)  | 40 (27)      |
| Previous smoker                    | 29,533<br>(30) | 28,884<br>(30) | 649 (33)      | 14,728<br>(28) | 14,371<br>(28) | 357 (31) | 4,824<br>(28)   | 4,711<br>(28)   | 113 (32)     | 2,619<br>(33)  | 2,567<br>(33)  | 52 (35)      |

|                                         |                |                |               |                |                |           |                |                |           |               |               |           |
|-----------------------------------------|----------------|----------------|---------------|----------------|----------------|-----------|----------------|----------------|-----------|---------------|---------------|-----------|
| Never smoker                            | 36,395<br>(37) | 35,635<br>(37) | 760 (39)      | 19,045<br>(36) | 18,573<br>(36) | 442 (39)  | 5,756<br>(34)  | 5,627<br>(34)  | 129 (37)  | 3,119<br>(39) | 3,062<br>(39) | 57 (38)   |
| Smoking duration, years<br>(Mean ± SD)  | 17.1±16.5      | 17.1±16.5      | 16.1±16.0     | 19.1±17.2      | 19.1±17.2      | 17.7±16.7 | 16.5±15.8      | 16.5±15.8      | 14.6±15.1 | 12.5±12.7     | 12.5±12.7     | 12.8±12.9 |
| Smoking intensity, n/day<br>(Mean ± SD) | 9.2±10.4       | 9.2±10.4       | 8.9±10.3      | 10.4±11.2      | 10.5±11.3      | 9.4±10.6  | 8.4±9.3        | 8.4±9.3        | 7.8±9.3   | 7.5±8.4       | 7.5±8.3       | 9.5±11.1  |
| <b>Marital status, N (%)</b>            |                |                |               |                |                |           |                |                |           |               |               |           |
| Single                                  | 8,450 (9)      | 8,298 (9)      | 152 (8)       | 3,194 (6)      | 3,138 (6)      | 56 (5)    | 1,782<br>(11)  | 1,757<br>(11)  | 25 (7)    | 749 (9)       | 735 (9)       | 14 (9)    |
| Married or living with<br>partner       | 70,137<br>(71) | 68,790<br>(71) | 1,347<br>(69) | 37,928<br>(72) | 37,130<br>(72) | 798 (70)  | 11,471<br>(68) | 11,235<br>(68) | 236 (67)  | 6,105<br>(76) | 6,001<br>(76) | 104 (70)  |
| Divorced/Separated                      | 13,755<br>(14) | 13,413<br>(14) | 342 (17)      | 8,917 (17)     | 8,694 (17)     | 223 (19)  | 2,098<br>(12)  | 2,039<br>(12)  | 59 (17)   | 1,024<br>(13) | 997 (13)      | 27 (18)   |
| Widowed                                 | 5,984 (6)      | 5,860 (6)      | 124 (6)       | 2,922 (6)      | 2,851 (6)      | 71 (6)    | 1,586 (9)      | 1,554 (9)      | 32 (9)    | 163 (2)       | 159 (2)       | 4 (3)     |
| <b>Employment status, N (%)</b>         |                |                |               |                |                |           |                |                |           |               |               |           |
| Employed                                | 75,111<br>(76) | 73,616<br>(76) | 1,495<br>(76) | 41,519<br>(78) | 40,650<br>(78) | 869 (76)  | 11,877<br>(70) | 11,609<br>(70) | 268 (76)  | 7,621<br>(95) | 7,477<br>(95) | 144 (97)  |

|                                       |                |                |          |                |                |          |                 |                 |              |                |                |              |
|---------------------------------------|----------------|----------------|----------|----------------|----------------|----------|-----------------|-----------------|--------------|----------------|----------------|--------------|
| Others                                | 23,215<br>(24) | 22,745<br>(24) | 470 (24) | 11,442<br>(22) | 11,163<br>(22) | 279 (24) | 5,060<br>(30)   | 4,976<br>(30)   | 84 (24)      | 420 (5)        | 415 (5)        | 5 (3)        |
| <b>Educational levels, N (%)*</b>     |                |                |          |                |                |          |                 |                 |              |                |                |              |
| Low level                             | 14,102<br>(14) | 13,845<br>(14) | 257 (13) | 7,819 (15)     | 7,644 (15)     | 175 (15) | 0 (0)           | 0 (0)           | 0 (0)        | 0 (0)          | 0 (0)          | 0 (0)        |
| Medium level                          | 40,914<br>(42) | 40,031<br>(42) | 883 (45) | 33,404<br>(63) | 32,644<br>(63) | 760 (66) | 0 (0)           | 0 (0)           | 0 (0)        | 0 (0)          | 0 (0)          | 0 (0)        |
| High level                            | 43,310<br>(44) | 42,485<br>(44) | 825 (42) | 11,738<br>(22) | 11,525<br>(22) | 213 (19) | 16,937<br>(100) | 16,585<br>(100) | 352<br>(100) | 8,041<br>(100) | 7,892<br>(100) | 149<br>(100) |
| COPD, N (%)#                          | 485 (0.5)      | 474 (0.5)      | 11 (1)   | 365 (1)        | 320 (1)        | 45 (4)   | 60 (0.4)        | 53 (0.3)        | 7 (2)        | 14 (0.2)       | 14 (0.2)       | 0 (0)        |
| Area-level mean year<br>income $\phi$ | 20991.8        | 20994.5        | 20857.3  | 20199.0        | 20193.7        | 20436.8  | 19229.3         | 19226.4         | 19366.9      | 18983.3        | 18980.8        | 19113.6      |

**Table S2 continued.**

| CEANS (N=20,387)            |                |                 |                |                  |
|-----------------------------|----------------|-----------------|----------------|------------------|
| Characteristic at baseline* |                |                 |                |                  |
|                             | SDPP (N=7,520) | SIXTY (N=3,931) | SALT (N=6,128) | SNAC-K (N=2,808) |



|                                      | Total          | No<br>asthma   | Asthma       | Total          | No<br>asthma   | Asthma   | Total         | No<br>asthma  | Asthma   | Total         | No<br>asthma  | Asthma   |
|--------------------------------------|----------------|----------------|--------------|----------------|----------------|----------|---------------|---------------|----------|---------------|---------------|----------|
| Enrollment period                    | 1992–1998      |                |              | 1997–1999      |                |          | 1998–2002     |               |          | 2001–2004     |               |          |
| End of follow-up                     | 2011           |                |              | 2011           |                |          | 2011          |               |          | 2011          |               |          |
| Person-years at risk, N              | 118,408        | 117,103        | 1,305        | 50,027         | 49,552         | 475      | 62,880        | 62,464        | 416      | 20,519        | 20,339        | 180      |
| Follow-up time, years<br>(Mean ± SD) | 15.7±2.6       | 15.9±2.4       | 9.8±4.2      | 12.7±2.6       | 12.8±2.5       | 6.7±3.8  | 10.3±2.5      | 10.3±2.4      | 5.3±3.3  | 7.3±2.9       | 7.3±2.9       | 5.5±2.5  |
| Number of observations               | 7,520          | 7,387          | 133          | 3,931          | 3,860          | 71       | 6,128         | 6,049         | 79       | 2,808         | 2,775         | 33       |
| Asthma incidence rate                | 1.8%           |                |              | 1.8%           |                |          | 1.3%          |               |          | 1.2%          |               |          |
| Age, years (Mean ± SD)               | 47.1±4.9       | 47.1±4.9       | 47.3±5.1     | 60.0±0         | 60.0±0         | 60.0±0   | 57.8±10.<br>6 | 57.8±10.<br>6 | 58.2±9.7 | 72.9±10.<br>4 | 72.9±10.<br>4 | 71.1±7.6 |
| <b>Age categories, N (%)</b>         |                |                |              |                |                |          |               |               |          |               |               |          |
| < 65 years old                       | 7,520<br>(100) | 7,387<br>(100) | 133<br>(100) | 3,931<br>(100) | 3,860<br>(100) | 71 (100) | 4,621<br>(75) | 4,567<br>(76) | 54 (68)  | 679 (24)      | 676 (24)      | 3 (9)    |
| ≥ 65 years old                       | 0 (0)          | 0 (0)          | 0 (0)        | 0 (0)          | 0 (0)          | 0 (0)    | 1,507<br>(25) | 1,482<br>(24) | 25 (32)  | 2,129<br>(76) | 2,099<br>(76) | 30 (91)  |
| Female, N (%)                        | 4,590 (61)     | 4,493 (61)     | 97 (73)      | 2,049 (52)     | 2,007 (52)     | 42 (59)  | 3,391<br>(55) | 3,339<br>(55) | 52 (66)  | 1,752<br>(62) | 1,734<br>(62) | 18 (55)  |

|                                     |            |            |           |            |            |           |            |            |           |            |            |           |
|-------------------------------------|------------|------------|-----------|------------|------------|-----------|------------|------------|-----------|------------|------------|-----------|
| BMI, kg/m <sup>2</sup> (Mean ± SD)  | 25.7±4.0   | 25.7±4.0   | 26.6±4.4  | 26.8±4.2   | 26.8±4.2   | 27.8±5.3  | 24.6±3.4   | 24.5±3.4   | 25.7±3.4  | 25.6±4.3   | 25.6±4.3   | 25.8±4.2  |
| <b>BMI, WHO categories, N (%)</b>   |            |            |           |            |            |           |            |            |           |            |            |           |
| <18.5                               | 51 (1)     | 51 (1)     | 0 (0)     | 26 (1)     | 26 (1)     | 0 (0)     | 94 (2)     | 93 (2)     | 1 (1)     | 77 (3)     | 77 (3)     | 0 (0)     |
| 18.5–24.9                           | 3,596 (48) | 3,544 (48) | 52 (39)   | 1,392 (35) | 1,368 (35) | 24 (34)   | 3,597 (59) | 3,564 (59) | 33 (42)   | 1,243 (44) | 1,228 (44) | 15 (45)   |
| 25.0–29.9                           | 2,927 (39) | 2,874 (39) | 53 (40)   | 1,752 (45) | 1,723 (45) | 29 (41)   | 2,036 (33) | 1,999 (33) | 37 (47)   | 1,126 (40) | 1,113 (40) | 13 (39)   |
| ≥30.0                               | 946 (13)   | 918 (12)   | 28 (21)   | 761 (19)   | 743 (19)   | 18 (25)   | 401 (7)    | 393 (6)    | 8 (10)    | 362 (13)   | 357 (13)   | 5 (15)    |
| <b>Smoking status, N (%)</b>        |            |            |           |            |            |           |            |            |           |            |            |           |
| Current smoker                      | 1,982 (26) | 1,947 (26) | 35 (26)   | 833 (21)   | 824 (21)   | 9 (13)    | 1,303 (36) | 1,295 (21) | 8 (10)    | 402 (14)   | 397 (14)   | 5 (15)    |
| Previous smoker                     | 2,737 (36) | 2,682 (36) | 55 (41)   | 1,514 (39) | 1,484 (38) | 30 (42)   | 2,039 (33) | 2,011 (33) | 28 (35)   | 1,072 (38) | 1,058 (38) | 14 (42)   |
| Never smoker                        | 2,801 (37) | 2,758 (37) | 43 (32)   | 1,584 (40) | 1,552 (40) | 32 (45)   | 2,786 (45) | 2,743 (45) | 43 (54)   | 1,334 (48) | 1,320 (48) | 14 (42)   |
| Smoking duration, years (Mean ± SD) | 12.7±13.0  | 12.7±13.0  | 13.6±13.3 | 15.5±16.3  | 15.5±16.3  | 15.3±16.3 | 14.7±17.0  | 14.8±17.0  | 10.3±14.1 | 15.6±19.2  | 15.6±19.2  | 18.1±20.4 |

|                                         |            |            |          |            |            |         |            |            |          |            |            |         |
|-----------------------------------------|------------|------------|----------|------------|------------|---------|------------|------------|----------|------------|------------|---------|
| Smoking intensity, n/day<br>(Mean ± SD) | 8.5±8.8    | 8.5±8.8    | 8.7±8.5  | 8.0±9.2    | 8.0±9.2    | 8.1±9.3 | 7.6±9.9    | 7.6±9.9    | 7.7±12.1 | 4.0 ±6.1   | 3.9±6.1    | 4.8±6.3 |
| <b>Marital status, N (%)</b>            |            |            |          |            |            |         |            |            |          |            |            |         |
| Single                                  | 1,234 (16) | 1,209 (16) | 25 (19)  | 181 (5)    | 175 (5)    | 6 (8)   | 855 (14)   | 837 (14)   | 18 (23)  | 455 (16)   | 447 (16)   | 8 (24)  |
| Married or living with partner          | 6,286 (84) | 6,178 (84) | 108 (81) | 2,907 (74) | 2,866 (74) | 41 (58) | 4,150 (68) | 4,107 (68) | 43 (54)  | 1,290 (46) | 1,273 (46) | 17 (52) |
| Divorced/Separated                      | 0 (0)      | 0 (0)      | 0 (0)    | 642 (16)   | 624 (16)   | 18 (25) | 688 (11)   | 676 (11)   | 12 (15)  | 386 (14)   | 383 (14)   | 3 (9)   |
| Widowed                                 | 0 (0)      | 0 (0)      | 0 (0)    | 201 (5)    | 195 (5)    | 6 (8)   | 435 (7)    | 429 (7)    | 6 (8)    | 677 (24)   | 672 (24)   | 5 (15)  |
| <b>Employment status, N (%)</b>         |            |            |          |            |            |         |            |            |          |            |            |         |
| Employed                                | 6,826 (91) | 6,705 (91) | 121 (91) | 2,669 (68) | 2,623 (68) | 46 (65) | 3,948 (64) | 3,905 (65) | 43 (54)  | 651 (23)   | 647 (23)   | 4 (12)  |
| Others                                  | 694 (9)    | 682 (9)    | 12 (9)   | 1,262 (32) | 1,237 (32) | 25 (35) | 2,180 (36) | 2,144 (35) | 36 (46)  | 2,157 (77) | 2,128 (77) | 29 (88) |
| <b>Educational levels, N (%)*</b>       |            |            |          |            |            |         |            |            |          |            |            |         |
| Low level                               | 2,370 (32) | 2,338 (32) | 32 (24)  | 1,570 (40) | 1,547 (40) | 23 (32) | 1,635 (27) | 1,615 (27) | 20 (25)  | 708 (25)   | 701 (25)   | 7 (21)  |
| Medium level                            | 2,889 (38) | 2,834 (38) | 55 (41)  | 1,267 (32) | 1,234 (32) | 24 (34) | 2,230 (36) | 2,198 (36) | 32 (41)  | 1,124 (40) | 1,112 (40) | 12 (36) |

|                                       |            |            |         |            |            |         |               |               |         |          |          |         |
|---------------------------------------|------------|------------|---------|------------|------------|---------|---------------|---------------|---------|----------|----------|---------|
| High level                            | 2,261 (30) | 2,215 (30) | 46 (35) | 1,094 (28) | 1,070 (28) | 24 (34) | 2,263<br>(37) | 2,236<br>(37) | 27 (34) | 976 (35) | 962 (35) | 14 (42) |
| COPD, N (%)#                          | 0 (0)      | 0 (0)      | 0 (0)   | 4 (0.1)    | 4 (0.1)    | 0 (0)   | 17 (0.3)      | 16 (0.3)      | 1 (1)   | 25 (1)   | 24 (1)   | 1 (3)   |
| Area-level mean year<br>income $\phi$ | 24,340.7   | 24340.6    | 24341.9 | 24762.8    | 24769.3    | 24410.6 | 25305.5       | 25315.1       | 24576.2 | 28665.6  | 28665.6  | 28664.0 |

BMI, body mass index; SD, standard deviation; WHO, world health organization; COPD, chronic obstructive pulmonary disease.

\*: Low educational level means primary school or less; Medium educational level means up to secondary school or equivalent; High educational level means university degree and more.

#: the prevalence of COPD among participants at baseline.

$\phi$ : Area-level mean year income is a continuous variable in euros, which is at municipality-level in 2001 for DCH and DNC and at neighbourhood level in 1994 for CEANS.

**Table S3.** Description of air pollutants by sub-cohorts and adult-onset asthma status for the year 2010.

| Pollutants                            | Cohorts | Number of<br>observations | Total      |            |       | No Asthma  |            |       | Asthma     |             |       |
|---------------------------------------|---------|---------------------------|------------|------------|-------|------------|------------|-------|------------|-------------|-------|
|                                       |         |                           | Mean ± SD  | Range      | IQR   | Mean ± SD  | Range      | IQR   | Mean ± SD  | Range       | IQR   |
| PM <sub>2.5</sub> , µg/m <sup>3</sup> |         |                           |            |            |       |            |            |       |            |             |       |
| CEANS                                 | All     | 98,326                    | 12.12±2.48 | 3.24–19.49 | 2.48  | 12.11±2.48 | 3.24–19.49 | 2.50  | 12.43±2.35 | 3.75–18.30  | 2.07  |
|                                       | SDPP    | 7,520                     | 7.63±0.92  | 3.79–10.96 | 0.75  | 7.63±0.92  | 3.79–10.96 | 0.75  | 7.70±0.90  | 4.30–10.70  | 0.68  |
|                                       | SIXTY   | 3,931                     | 8.31±0.92  | 3.24–11.01 | 0.88  | 8.30±0.92  | 3.24–11.01 | 0.89  | 8.63±0.56  | 7.12–10.11  | 0.59  |
|                                       | SALT    | 6,128                     | 8.38±0.84  | 3.47–11.37 | 0.88  | 8.38±0.84  | 3.47–11.37 | 0.88  | 8.31±0.93  | 3.75–9.96   | 0.98  |
|                                       | SNAC-K  | 2,808                     | 8.56±0.83  | 5.16–11.37 | 0.59  | 8.56±0.83  | 5.16–11.37 | 0.59  | 8.54±1.00  | 5.53–9.89   | 0.53  |
| DCH                                   | DCH     | 52,961                    | 13.20±1.43 | 7.29–19.49 | 1.58  | 13.20±1.43 | 7.29–19.49 | 1.58  | 13.29±1.43 | 7.70–18.30  | 1.85  |
| DNC                                   | 1993    | 16,937                    | 12.74±1.54 | 6.48–19.14 | 1.87  | 12.74±1.54 | 6.48–19.14 | 1.86  | 12.91±1.54 | 9.55–16.93  | 1.93  |
|                                       | 1999    | 8,041                     | 13.80±1.51 | 6.89–19.49 | 2.34  | 13.80±1.51 | 6.89–19.49 | 2.34  | 13.66±1.61 | 9.58–16.81  | 2.54  |
| NO <sub>2</sub> , µg/m <sup>3</sup>   |         |                           |            |            |       |            |            |       |            |             |       |
| CEANS                                 | All     | 98,326                    | 25.10±7.97 | 2.68–72.23 | 11.88 | 25.08±7.97 | 2.68–72.23 | 11.88 | 26.25±7.79 | 5.68–62.36  | 11.80 |
|                                       | SDPP    | 7,520                     | 15.47±4.29 | 2.96–37.09 | 5.39  | 15.47±4.29 | 2.96–37.09 | 5.38  | 15.78±4.46 | 6.24–26.10  | 5.85  |
|                                       | SIXTY   | 3,931                     | 20.67±6.14 | 2.68–47.88 | 7.01  | 20.62±6.15 | 2.68–47.88 | 7.04  | 22.98±5.24 | 10.36–38.20 | 6.03  |

|                                          |        |        |            |             |       |            |             |       |            |             |       |
|------------------------------------------|--------|--------|------------|-------------|-------|------------|-------------|-------|------------|-------------|-------|
| DCH                                      | SALT   | 6,128  | 21.29±6.18 | 2.98–50.32  | 7.34  | 21.29±6.19 | 2.98–50.23  | 7.33  | 21.30±5.79 | 5.68–39.79  | 7.39  |
|                                          | SNAC-K | 2,808  | 27.41±5.08 | 11.62–42.61 | 7.31  | 27.40±5.08 | 11.62–42.61 | 7.38  | 27.79±7.86 | 16.44–35.02 | 6.19  |
|                                          | DCH    | 52,961 | 28.03±6.83 | 6.40–72.23  | 9.98  | 28.01±6.84 | 6.40–72.23  | 10.00 | 28.96±6.42 | 9.50–62.36  | 9.32  |
| DNC                                      | 1993   | 16,937 | 21.89±8.00 | 4.54–72.23  | 10.51 | 21.87±8.00 | 4.54–72.23  | 10.53 | 22.74±7.94 | 6.75–51.92  | 10.51 |
|                                          | 1999   | 8,041  | 25.83±8.47 | 6.42–54.26  | 13.77 | 25.81±8.46 | 6.42–54.26  | 13.74 | 26.79±8.96 | 8.59–47.52  | 15.58 |
| <b>BC, 10<sup>-5</sup>m<sup>-1</sup></b> |        |        |            |             |       |            |             |       |            |             |       |
| CEANS                                    | All    | 98,326 | 1.17±0.41  | 0.11–3.66   | 0.64  | 1.17±0.41  | 0.11–3.66   | 0.64  | 1.23±0.41  | 0.22–3.18   | 0.62  |
|                                          | SDPP   | 7,520  | 0.56±0.19  | 0.14–1.39   | 0.30  | 0.56±0.19  | 0.14–1.39   | 0.30  | 0.58±0.21  | 0.22–1.15   | 0.33  |
|                                          | SIXTY  | 3,931  | 0.80±0.25  | 0.11–2.10   | 0.32  | 0.80±0.25  | 0.11–2.10   | 0.32  | 0.90±0.25  | 0.28–1.50   | 0.31  |
|                                          | SALT   | 6,128  | 0.83±0.25  | 0.16–2.43   | 0.31  | 0.83±0.25  | 0.16–2.43   | 0.31  | 0.82±0.25  | 0.29–2.07   | 0.31  |
|                                          | SNAC-K | 2,808  | 1.08±0.15  | 0.43–1.74   | 0.15  | 1.08±0.15  | 0.43–1.74   | 0.15  | 1.09±0.13  | 0.86–1.44   | 0.11  |
| DCH                                      | DCH    | 52,961 | 1.34±0.35  | 0.35–3.66   | 0.48  | 1.34±0.35  | 0.35–3.66   | 0.48  | 1.38±0.33  | 0.49–3.18   | 0.47  |
| DNC                                      | 1993   | 16,937 | 1.09±0.37  | 0.13–3.66   | 0.52  | 1.09±0.37  | 0.13–3.66   | 1.52  | 1.12±0.37  | 0.34–2.49   | 0.52  |
|                                          | 1999   | 8,041  | 1.30±0.38  | 0.36–2.74   | 0.55  | 1.29±0.38  | 0.36–2.74   | 0.55  | 1.35±0.40  | 0.56–2.30   | 0.74  |
| <b>O<sub>3</sub>, µg/m<sup>3</sup></b>   |        |        |            |             |       |            |             |       |            |             |       |
|                                          | All    | 98,326 | 78.12±4.62 | 50.96–91.87 | 6.00  | 78.13±4.61 | 50.96–91.87 | 6.00  | 77.95±4.81 | 59.58–90.24 | 6.09  |

|       |        |        |            |             |      |            |             |      |            |             |      |
|-------|--------|--------|------------|-------------|------|------------|-------------|------|------------|-------------|------|
| CEANS | SDPP   | 7,520  | 77.55±1.92 | 68.37–85.01 | 2.59 | 77.55±1.92 | 68.37–85.01 | 2.59 | 77.59±1.98 | 71.55–82.10 | 2.81 |
|       | SIXTY  | 3,931  | 76.70±2.52 | 63.15–83.79 | 2.88 | 76.72±2.52 | 63.15–83.79 | 2.90 | 75.82±2.50 | 68.60–81.28 | 2.96 |
|       | SALT   | 6,128  | 76.57±2.73 | 57.17–84.87 | 2.87 | 76.56±2.73 | 57.17–84.87 | 2.88 | 76.80±2.42 | 64.54–82.58 | 2.27 |
|       | SNAC-K | 2,808  | 75.11±2.65 | 58.63–82.50 | 2.91 | 75.11±2.66 | 58.63–82.50 | 2.91 | 74.87±2.11 | 69.21–77.96 | 2.58 |
| DCH   | DCH    | 52,961 | 77.54±5.10 | 50.96–87.79 | 7.15 | 77.54±5.10 | 50.96–87.79 | 7.15 | 77.38±5.17 | 59.58–86.96 | 7.37 |
| DNC   | 1993   | 16,937 | 80.41±4.00 | 50.96–91.87 | 3.95 | 80.42±3.99 | 50.96–91.87 | 3.95 | 79.99±4.57 | 61.37–90.06 | 4.25 |
|       | 1999   | 8,041  | 80.62±3.83 | 57.02–91.83 | 3.88 | 80.63±3.83 | 57.02–91.83 | 3.87 | 80.19±4.16 | 61.85–90.24 | 4.34 |

---

PM<sub>2.5</sub>, particulate matter with diameter < 2.5 µm; NO<sub>2</sub>, nitrogen dioxide; BC, black carbon; O<sub>3</sub>, ozone.

The annual average concentrations of PM<sub>2.5</sub>, NO<sub>2</sub>, BC and O<sub>3</sub> were estimated for the year 2010 at 100 m resolution. O<sub>3</sub> was estimated during the warm season from April 1 through September 30.

**Table S4.** Characteristics of participants at baseline (1992–2004) and air pollutants for the year 2010 by the quintiles of NO<sub>2</sub> concentrations.

| Characteristic                              | NO <sub>2</sub> quintiles |               |               |               |               |
|---------------------------------------------|---------------------------|---------------|---------------|---------------|---------------|
|                                             | 1st                       | 2nd           | 3rd           | 4th           | 5th           |
| NO <sub>2</sub> , µg/m <sup>3</sup> (Range) | 2.68–17.87                | 17.87–22.51   | 22.51–27.31   | 27.31–32.59   | 32.59–72.23   |
| No of participants, N                       | 19,665                    | 19,664        | 19,666        | 19,665        | 19,666        |
| Age, years (Mean ± SD)                      | 53.43 ± 7.85              | 55.52 ± 7.83  | 56.52 ± 7.35  | 57.57 ± 7.28  | 55.89 ± 6.50  |
| Female, N (%)                               | 13,762 (70)               | 13,528 (69)   | 12,641 (64)   | 11,866 (60)   | 12,695 (65)   |
| BMI, kg/m <sup>2</sup> (Mean ± SD)          | 25.10 ± 3.92              | 25.04 ± 3.86  | 25.34 ± 4.00  | 25.74 ± 4.16  | 25.47 ± 4.17  |
| Normal weight, N (%)*                       | 10,487 (53)               | 10,507 (53)   | 10,015 (51)   | 9,113 (46)    | 9,779 (50)    |
| Smoking duration                            | 14.80 ± 15.31             | 15.87 ± 16.12 | 17.13 ± 16.77 | 18.09 ± 17.16 | 19.58 ± 16.77 |
| Smoking intensity                           | 8.50 ± 9.87               | 8.61 ± 9.96   | 9.11 ± 10.44  | 9.44 ± 10.68  | 10.50 ± 10.76 |
| Never smoker, N (%)                         | 7,607 (39)                | 7,670 (39)    | 7,497 (38)    | 7,346 (37)    | 6,275 (32)    |
| Married or living with partner, N (%)       | 16,050 (82)               | 15,032 (76)   | 14,042 (71)   | 13,278 (68)   | 11,743 (60)   |
| Employed, N (%)                             | 15,573 (79)               | 14,840 (75)   | 14,593 (74)   | 14,351 (73)   | 15,754 (80)   |
| High educational level, N (%)               | 10,578 (54)               | 9,791 (50)    | 8,160 (41)    | 6,684 (34)    | 8,097 (41)    |
| Mean year income, €φ                        | 21154.41                  | 20985.80      | 21083.05      | 21213.40      | 20522.29      |



|                                                   |              |              |              |              |              |
|---------------------------------------------------|--------------|--------------|--------------|--------------|--------------|
| PM <sub>2.5</sub> , µg/m <sup>3</sup> (Mean ± SD) | 9.93 ± 2.38  | 11.16 ± 2.09 | 12.16 ± 1.81 | 13.00 ± 1.74 | 14.33 ± 1.74 |
| BC, 10 <sup>-5</sup> m <sup>-1</sup> (Mean ± SD)  | 0.66 ± 0.19  | 0.94 ± 0.19  | 1.16 ± 0.16  | 1.41 ± 0.21  | 1.70 ± 0.22  |
| O <sub>3</sub> , µg/m <sup>3</sup> (Mean ± SD)    | 80.43 ± 2.71 | 79.35 ± 2.97 | 78.80 ± 4.07 | 78.43 ± 3.70 | 73.60 ± 5.67 |

---

\*: Normal weight means BMI values from 18.5 to 24.9 according to the World Health Organization (WHO) categories; High educational level means university degree and more.

φ: Mean year income is a continuous variable in euros, which is at municipality level in 2001 for DCH and DNC and at neighbourhood level in 1994 for CEANS.

**Figure S1.** The temporal variations of annual mean air pollution concentrations back-extrapolated using the ratio (left) and the absolute difference (right) method during follow-up periods (1992-2011 for CEANS and 1993-2015 for DCH) in 71,311 participants of CEANS (N=19,320) and DCH (N=51,991) cohorts.

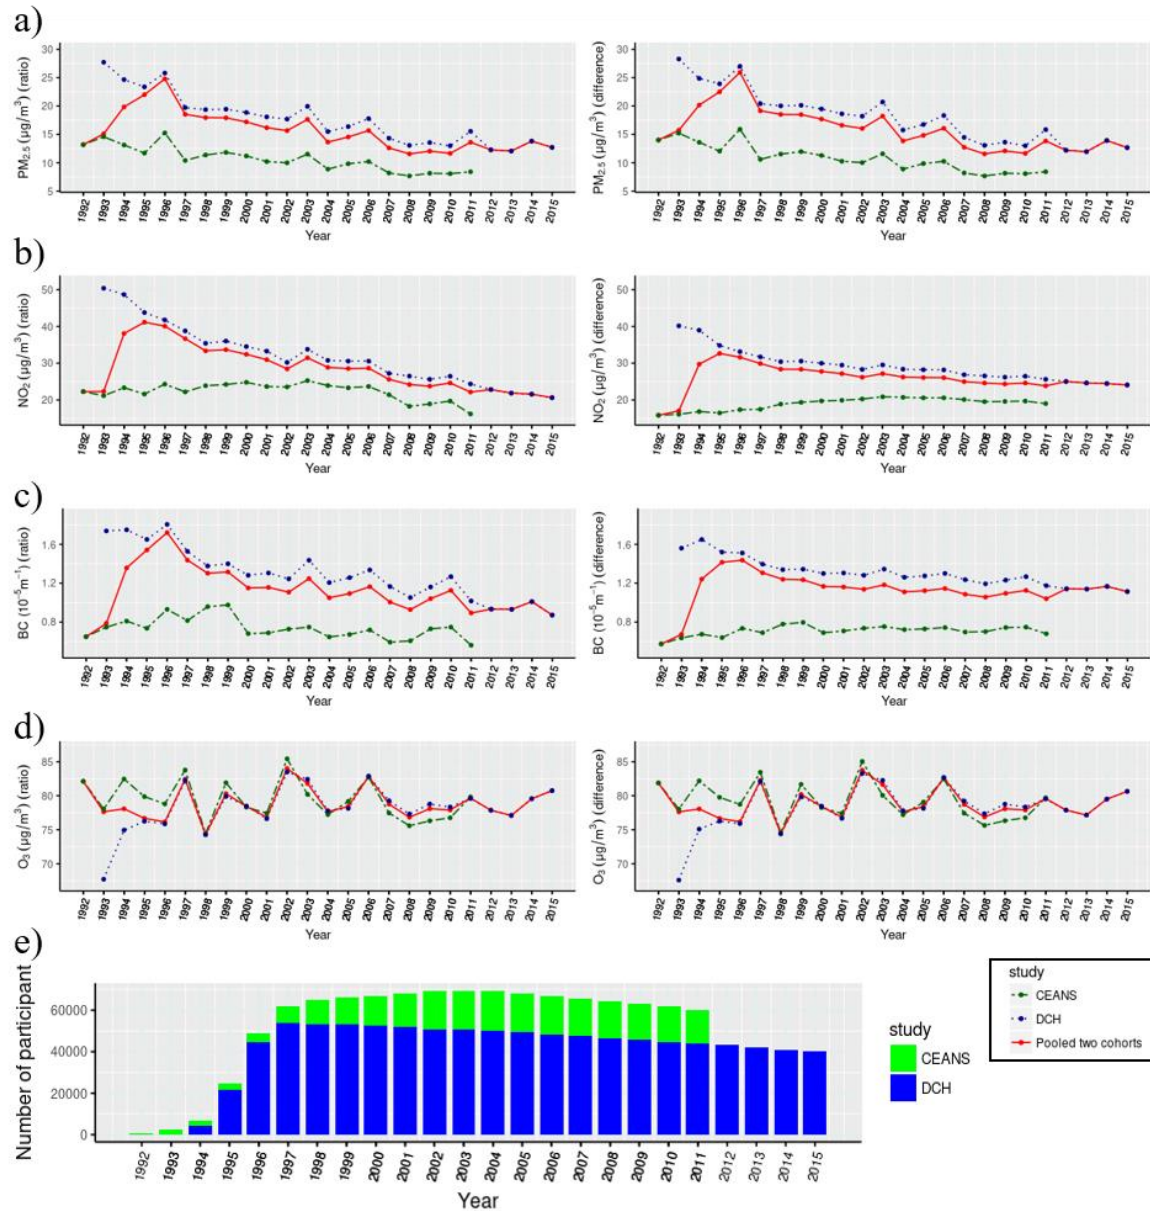

**Table S5.** Pearson correlations between air pollutants by sub-cohorts for the year 2010.

| <b>Cohorts</b>       | <b>Number of<br/>observations</b> | <b>Pollutants</b> | <b>PM<sub>2.5</sub></b> | <b>NO<sub>2</sub></b> | <b>BC</b> | <b>O<sub>3</sub></b> |
|----------------------|-----------------------------------|-------------------|-------------------------|-----------------------|-----------|----------------------|
| <b>All</b>           | 98,326                            |                   |                         |                       |           |                      |
|                      |                                   | PM <sub>2.5</sub> | 1.00                    |                       |           |                      |
|                      |                                   | NO <sub>2</sub>   | 0.63                    | 1.00                  |           |                      |
|                      |                                   | BC                | 0.74                    | 0.91                  | 1.00      |                      |
|                      |                                   | O <sub>3</sub>    | -0.13                   | -0.48                 | -0.37     | 1.00                 |
| <b>CEANS- SDPP</b>   | 7,520                             |                   |                         |                       |           |                      |
|                      |                                   | PM <sub>2.5</sub> | 1.00                    |                       |           |                      |
|                      |                                   | NO <sub>2</sub>   | 0.60                    | 1.00                  |           |                      |
|                      |                                   | BC                | 0.49                    | 0.67                  | 1.00      |                      |
|                      |                                   | O <sub>3</sub>    | -0.18                   | -0.70                 | -0.33     | 1.00                 |
| <b>CEANS- SIXTY</b>  | 3,931                             |                   |                         |                       |           |                      |
|                      |                                   | PM <sub>2.5</sub> | 1.00                    |                       |           |                      |
|                      |                                   | NO <sub>2</sub>   | 0.69                    | 1.00                  |           |                      |
|                      |                                   | BC                | 0.59                    | 0.84                  | 1.00      |                      |
|                      |                                   | O <sub>3</sub>    | -0.45                   | -0.71                 | -0.71     | 1.00                 |
| <b>CEANS- SALT</b>   | 6,128                             |                   |                         |                       |           |                      |
|                      |                                   | PM <sub>2.5</sub> | 1.00                    |                       |           |                      |
|                      |                                   | NO <sub>2</sub>   | 0.67                    | 1.00                  |           |                      |
|                      |                                   | BC                | 0.55                    | 0.84                  | 1.00      |                      |
|                      |                                   | O <sub>3</sub>    | -0.47                   | -0.74                 | -0.76     | 1.00                 |
| <b>CEANS- SNAC-K</b> | 2,808                             |                   |                         |                       |           |                      |
|                      |                                   | PM <sub>2.5</sub> | 1.00                    |                       |           |                      |
|                      |                                   | NO <sub>2</sub>   | 0.75                    | 1.00                  |           |                      |
|                      |                                   | BC                | 0.28                    | 0.43                  | 1.00      |                      |

|                 |        |                   |       |       |       |      |
|-----------------|--------|-------------------|-------|-------|-------|------|
|                 |        | O <sub>3</sub>    | -0.49 | -0.65 | -0.74 | 1.00 |
| <b>DCH</b>      | 52,961 |                   |       |       |       |      |
|                 |        | PM <sub>2.5</sub> | 1.00  |       |       |      |
|                 |        | NO <sub>2</sub>   | 0.72  | 1.00  |       |      |
|                 |        | BC                | 0.66  | 0.91  | 1.00  |      |
|                 |        | O <sub>3</sub>    | -0.56 | -0.61 | -0.57 | 1.00 |
| <b>DNC-1993</b> | 16,937 |                   |       |       |       |      |
|                 |        | PM <sub>2.5</sub> | 1.00  |       |       |      |
|                 |        | NO <sub>2</sub>   | 0.64  | 1.00  |       |      |
|                 |        | BC                | 0.69  | 0.92  | 1.00  |      |
|                 |        | O <sub>3</sub>    | -0.32 | -0.42 | -0.42 | 1.00 |
| <b>DNC-1999</b> | 8,041  |                   |       |       |       |      |
|                 |        | PM <sub>2.5</sub> | 1.00  |       |       |      |
|                 |        | NO <sub>2</sub>   | 0.61  | 1.00  |       |      |
|                 |        | BC                | 0.64  | 0.93  | 1.00  |      |
|                 |        | O <sub>3</sub>    | -0.16 | -0.21 | -0.20 | 1.00 |

**Table S6.** Results for threshold analyses of associations between long-term air pollution exposure and adult-onset asthma based on Model 3 (N=98,326).

| <b>Pollutants</b>       | <b>Threshold</b>                     | <b>AIC</b> | <b>HR (95%CI)</b> |
|-------------------------|--------------------------------------|------------|-------------------|
| <b>PM<sub>2.5</sub></b> | No threshold                         | 36807.6    | 1.22 (1.04–1.43)  |
|                         | 5 µg/m <sup>3</sup>                  | 36807.61   | 1.22 (1.04–1.43)  |
|                         | 7.5 µg/m <sup>3</sup>                | 36807.78   | 1.22 (1.04–1.43)  |
|                         | 10 µg/m <sup>3</sup>                 | 36808.71   | 1.20 (1.02–1.42)  |
| <b>NO<sub>2</sub></b>   | No threshold                         | 36790.44   | 1.17 (1.10–1.25)  |
|                         | 10 µg/m <sup>3</sup>                 | 36790.73   | 1.17 (1.10–1.25)  |
|                         | 15 µg/m <sup>3</sup>                 | 36791.04   | 1.18 (1.10–1.26)  |
|                         | 20 µg/m <sup>3</sup>                 | 36796.19   | 1.17 (1.09–1.26)  |
| <b>BC</b>               | No threshold                         | 36795.5    | 1.15 (1.08–1.23)  |
|                         | 0.5 10 <sup>-5</sup> m <sup>-1</sup> | 36795.68   | 1.15 (1.08–1.23)  |
|                         | 1 10 <sup>-5</sup> m <sup>-1</sup>   | 36801.14   | 1.15(1.07–1.25)   |
|                         | 1.5 10 <sup>-5</sup> m <sup>-1</sup> | 36810.49   | 1.16 (0.98–1.37)  |
| <b>O<sub>3</sub></b>    | No threshold                         | 36809.26   | 0.90 (0.81–0.99)  |
|                         | 40 µg/m <sup>3</sup>                 | 36809.26   | 0.90 (0.81–0.99)  |
|                         | 60 µg/m <sup>3</sup>                 | 36809.22   | 0.90 (0.81–0.99)  |
|                         | 80 µg/m <sup>3</sup>                 | 36811.37   | 0.78 (0.56–1.09)  |

AIC, Akaike Information Criterion. Results are presented as hazard ratio (HR) and 95% confidence interval (CI) [HR (95%CI)] for the following increases: 5 µg/m<sup>3</sup> for PM<sub>2.5</sub>, 10 µg/m<sup>3</sup> for NO<sub>2</sub>, 0.5 10<sup>-5</sup> m<sup>-1</sup> for BC and 10 µg/m<sup>3</sup> for O<sub>3</sub>.

\*: Lower AIC values represent improved prediction of models for the associations.

**Table S7.** Results for Sensitivity Analysis by time-varying exposure analyses among two cohorts with available information (CEANS and DCH, N=71,311) based on Model 3.

| Pollutants              | Main model 3                  | Time-varying analyses                |                                     |                  |                   |
|-------------------------|-------------------------------|--------------------------------------|-------------------------------------|------------------|-------------------|
|                         | Reduced dataset<br>(N=71,311) | Strata by per year of follow-up time | Strata by 5-years of follow-up time |                  |                   |
|                         |                               | Ratio method                         | Difference method                   | Ratio method     | Difference method |
| <b>PM<sub>2.5</sub></b> | 1.26 (1.04–1.53)              | 1.18 (1.01–1.36)                     | 1.26 (1.04–1.53)                    | 1.15 (1.03–1.29) | 1.17 (1.04–1.32)  |
| <b>NO<sub>2</sub></b>   | 1.19 (1.10–1.29)              | 1.17 (1.09–1.25)                     | 1.20 (1.11–1.30)                    | 1.17 (1.09–1.25) | 1.20 (1.11–1.30)  |
| <b>BC</b>               | 1.17 (1.08–1.27)              | 1.18 (1.09–1.28)                     | 1.19 (1.09–1.28)                    | 1.19 (1.10–1.28) | 1.19 (1.10–1.28)  |
| <b>O<sub>3</sub></b>    | 0.95 (0.84–1.06)              | 0.98 (0.92–1.04)                     | 0.98 (0.92–1.04)                    | 0.96 (0.92–1.01) | 0.96 (0.91–1.02)  |

Results are presented as hazard ratio and 95% confidence interval [HR (95%CI)] for the following increases: 5  $\mu\text{g}/\text{m}^3$  for PM<sub>2.5</sub>, 10  $\mu\text{g}/\text{m}^3$  for NO<sub>2</sub>, 0.5  $10^{-5} \text{ m}^{-1}$  for BC, and 10  $\mu\text{g}/\text{m}^3$  for O<sub>3</sub>.

**Figure S2.** Results for Sensitivity Analysis by time-varying exposure analyses among two cohorts with available information (CEANS and DCH, N=71,311) based on Model 3.

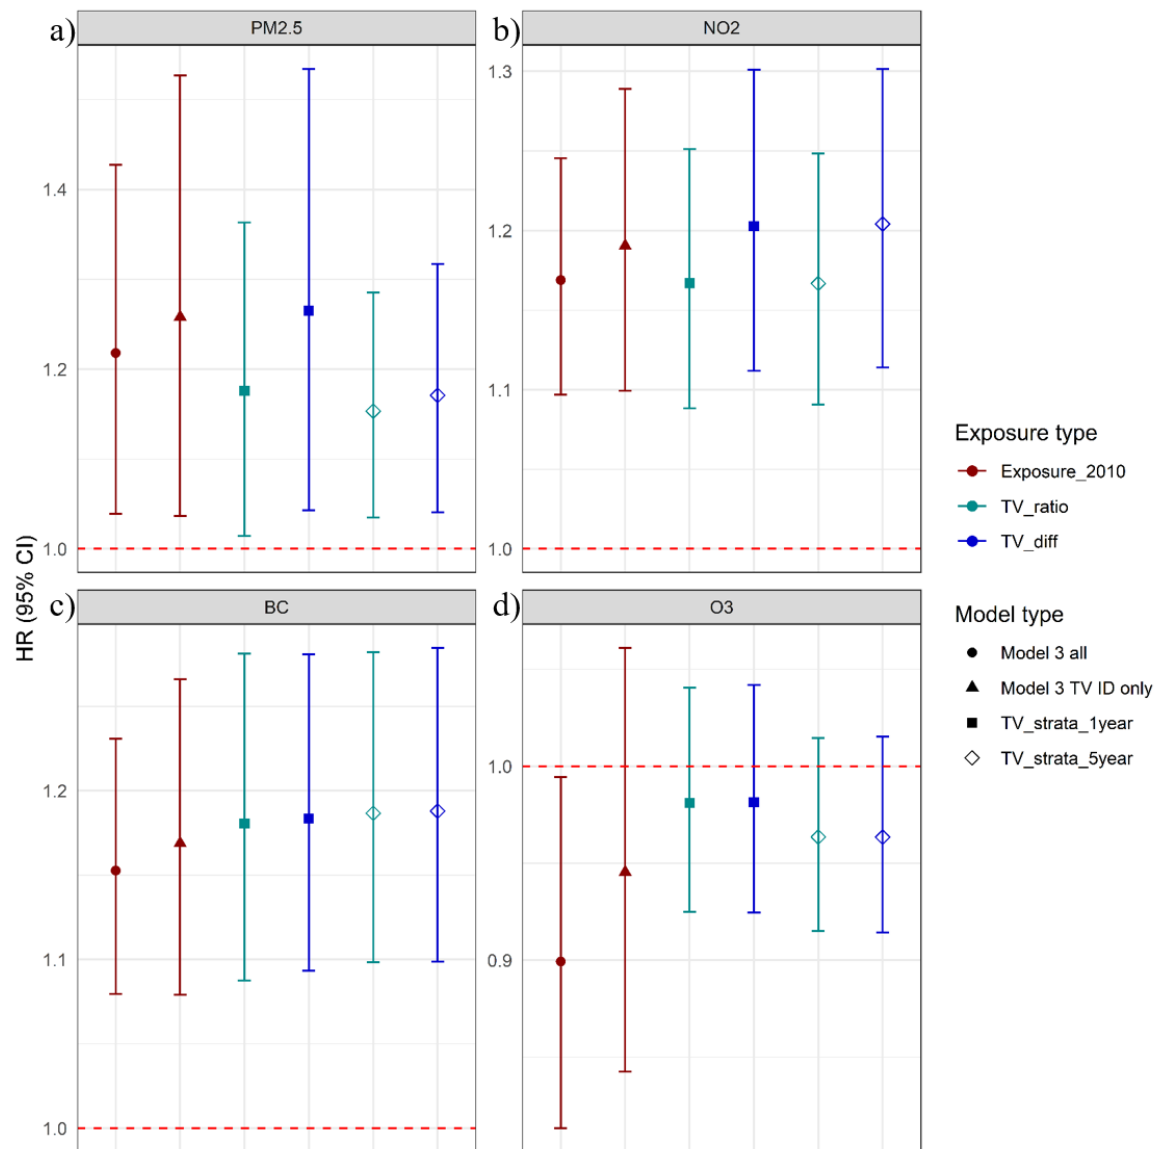

Three different exposure types were applied: Exposure\_2010 indicates exposure in 2010; TV\_ratio indicates time-varying exposure analysis with a ratio method; TV\_ratio indicates time-varying exposure analysis with an absolute difference method.

Four different exposure types were applied: Model 3 all indicates using model 3 with all cohort participants; Model 3 TV ID only indicates using model 3 with time-varying exposure analysis available two cohort participants; TV\_strata\_1year indicates time-varying exposure

analysis with 1-year strata for the calendar time; TV\_strata\_5year indicates time-varying exposure analysis with 5-year strata for the calendar time.



**Table S8.** Back-extrapolated air pollution exposure at baseline and adult-onset asthma based on Model 3.

| Pollutants              | Main model 3     | Baseline exposure analyses |                   |
|-------------------------|------------------|----------------------------|-------------------|
|                         | (N=98,326)       | Ratio method               | Difference method |
| <b>PM<sub>2.5</sub></b> | 1.22 (1.04–1.43) | 1.04 (0.96–1.12)           | 0.98 (0.89–1.09)  |
| <b>NO<sub>2</sub></b>   | 1.17 (1.10–1.25) | 1.12 (1.07–1.17)           | 1.17 (1.10–1.25)  |
| <b>BC</b>               | 1.15 (1.08–1.23) | 1.11 (1.05–1.18)           | 1.15 (1.07–1.23)  |
| <b>O<sub>3</sub></b>    | 0.90 (0.81–0.99) | 0.95 (0.87–1.05)           | 0.95 (0.86–1.05)  |

Results are presented as hazard ratio and 95% confidence interval [HR (95%CI)] for the following increases: 5 µg/m<sup>3</sup> for PM<sub>2.5</sub>, 10 µg/m<sup>3</sup> for NO<sub>2</sub>, 0.5 10<sup>-5</sup> m<sup>-1</sup> for BC, and 10 µg/m<sup>3</sup> for O<sub>3</sub>.

**Table S9.** Results for Sensitivity Analysis by restricting participants to different cohorts in Model 3.

| Cohorts       | Number of<br>observations | HR (95%CI)        |                  |                  |                  |
|---------------|---------------------------|-------------------|------------------|------------------|------------------|
|               |                           | PM <sub>2.5</sub> | NO <sub>2</sub>  | BC               | O <sub>3</sub>   |
| All cohorts   | 98,326                    | 1.22 (1.04–1.43)  | 1.17 (1.10–1.25) | 1.15 (1.08–1.23) | 0.90 (0.81–0.99) |
| Exclude CEANS | 77,939                    | 1.24 (1.06–1.47)  | 1.17 (1.10–1.26) | 1.15 (1.08–1.23) | 0.87 (0.79–0.97) |
| Exclude DCH   | 45,365                    | 1.18 (0.91–1.53)  | 1.14 (1.04–1.25) | 1.15 (1.03–1.28) | 0.79 (0.65–0.95) |
| Exclude DNC   | 73,348                    | 1.25 (1.03–1.51)  | 1.19 (1.10–1.29) | 1.17 (1.08–1.26) | 0.95 (0.84–1.06) |
| Only CEANS    | 20,387                    | 1.42 (0.74–2.71)  | 1.15 (0.93–1.41) | 1.24 (0.97–1.59) | 0.88 (0.55–1.39) |
| Only DCH      | 52,961                    | 1.26 (1.02–1.57)  | 1.21 (1.10–1.33) | 1.16 (1.06–1.27) | 0.93 (0.82–1.06) |
| Only DNC      | 24,978                    | 1.17 (0.88–1.56)  | 1.14 (1.02–1.27) | 1.13 (1.01–1.28) | 0.74 (0.60–0.92) |

Results are presented as hazard ratio and 95% confidence interval [HR (95%CI)] for the following increases: 5 µg/m<sup>3</sup> for PM<sub>2.5</sub>, 10 µg/m<sup>3</sup> for NO<sub>2</sub>, 0.5 10<sup>-5</sup> m<sup>-1</sup> for BC and 10 µg/m<sup>3</sup> for O<sub>3</sub>.

**Figure S3.** Effect modification on the association of long-term air pollution exposure with adult-onset asthma by baseline characters.

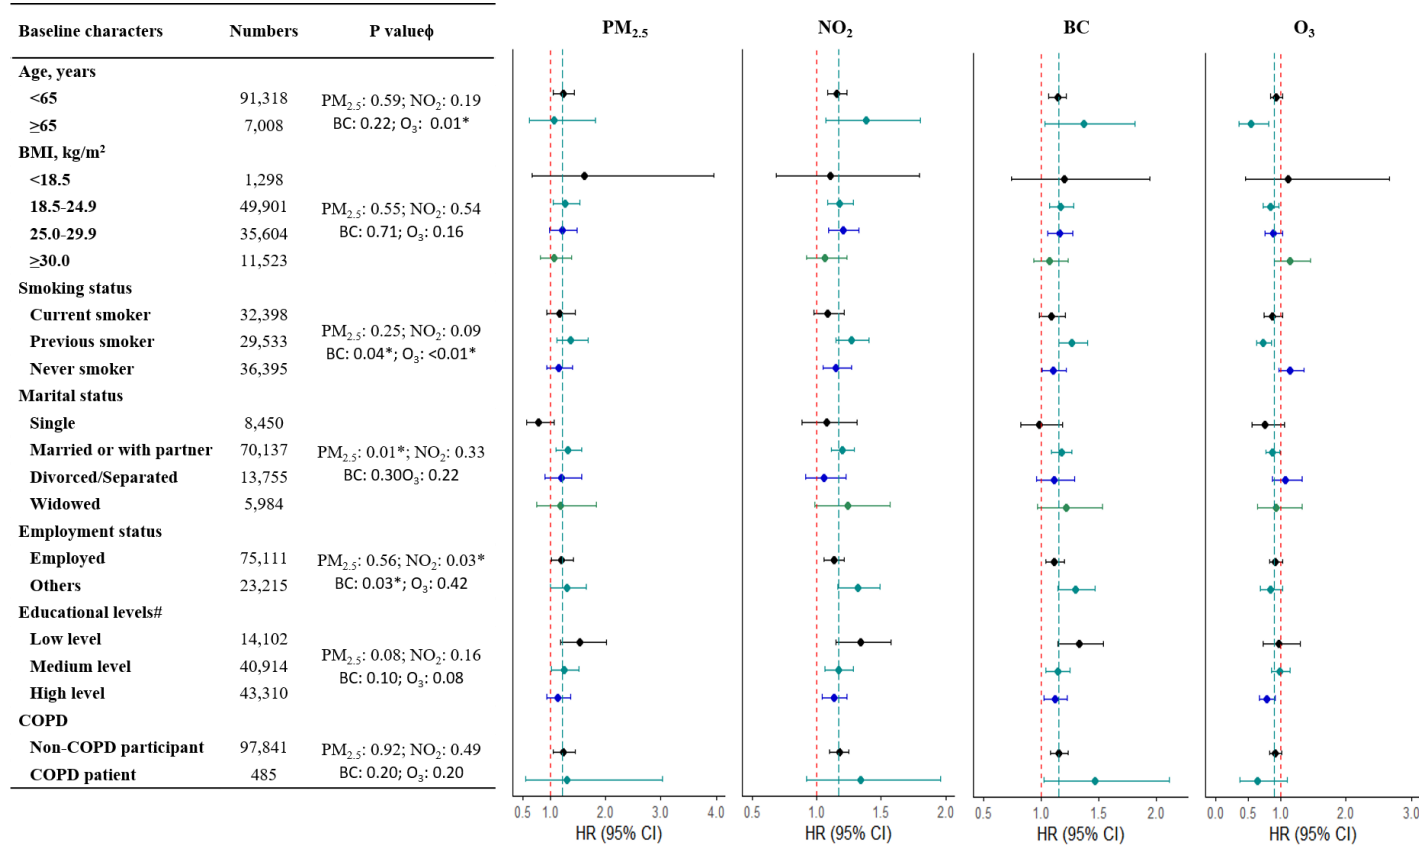

Effect modification analyses were conducted based on Model 3 and evaluated by introducing interaction terms. *P* values for whether there were statistical differences between strata were tested by the Wald test. Red long dash lines indicate the HRs equal to 1 and green long dash lines indicate the estimated HRs for all participants based on Model 3.

#: Low educational level means primary school or less; Medium educational level means up to secondary school or equivalent; High educational level means university degree and more.

\*: A statistically significant  $P$  value (at 5% level) for effect modification analyses.
