# Supplementary material
Source: HighWire-hosted journal article supplement (https://erj.ersjournals.com/content/57/6/2003099)
Supplement: inline-supplementary-material-2 [file inline-supplementary-material-2.pdf]

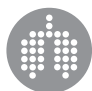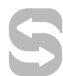

SHAREABLE PDF

# Long-term exposure to low-level air pollution and incidence of asthma: the ELAPSE project

Shuo Liu<sup>1</sup>, Jeanette Thorming Jørgensen<sup>1</sup>, Petter Ljungman<sup>2,3</sup>, Göran Pershagen<sup>2,4</sup>, Tom Bellander<sup>2,4</sup>, Karin Leander<sup>5</sup>, Patrik K.E. Magnusson<sup>5</sup>, Debora Rizzuto<sup>6,7</sup>, Ulla A. Hvidtfeldt<sup>8</sup>, Ole Raaschou-Nielsen<sup>8,9</sup>, Kathrin Wolf<sup>10</sup>, Barbara Hoffmann<sup>11</sup>, Bert Brunekreef<sup>12</sup>, Maciej Strak<sup>12,13</sup>, Jie Chen<sup>12</sup>, Amar Mehta<sup>1</sup>, Richard W. Atkinson<sup>14</sup>, Mariska Bauwelinck<sup>15</sup>, Raphaëlle Varraso<sup>16</sup>, Marie-Christine Boutron-Ruault<sup>16,17</sup>, Jørgen Brandt<sup>9,18</sup>, Giulia Cesaroni<sup>19</sup>, Francesco Forastiere<sup>19</sup>, Daniela Fecht<sup>20</sup>, John Gulliver<sup>21,22</sup>, Ole Hertel<sup>9</sup>, Kees de Hoogh<sup>23</sup>, Nicole A.H. Janssen<sup>13</sup>, Klea Katsouyanni<sup>24</sup>, Matthias Ketzel<sup>9,25</sup>, Jochem O. Klompemaker<sup>12,13</sup>, Gabriele Nagel<sup>26</sup>, Bente Oftedal<sup>27</sup>, Annette Peters<sup>10,28</sup>, Anne Tjønneland<sup>1,8</sup>, Sophia P. Rodopoulou<sup>24</sup>, Evangelia Samoli<sup>24</sup>, Doris Tove Kristoffersen<sup>29</sup>, Torben Sigsgaard<sup>30</sup>, Massimo Stafoggia<sup>2,19</sup>, Danielle Vienneau<sup>13</sup>, Gudrun Weinmayr<sup>26</sup>, Gerard Hoek<sup>12</sup> and Zorana Jovanovic Andersen<sup>1,31</sup>

**Affiliations:** <sup>1</sup>Dept of Public Health, University of Copenhagen, Copenhagen, Denmark. <sup>2</sup>Institute of Environmental Medicine, Karolinska Institutet, Stockholm, Sweden. <sup>3</sup>Dept of Cardiology, Danderyd University Hospital, Stockholm, Sweden. <sup>4</sup>Center for Occupational and Environmental Medicine, Region Stockholm, Stockholm, Sweden. <sup>5</sup>Dept of Medical Epidemiology and Biostatistics, Karolinska Institutet, Stockholm, Sweden. <sup>6</sup>Aging Research Center, Dept of Neurobiology, Care Sciences and Society, Karolinska Institutet and Stockholm University, Stockholm, Sweden. <sup>7</sup>The Stockholm Gerontology Research Center, Stockholm, Sweden. <sup>8</sup>Danish Cancer Society Research Center, Copenhagen, Denmark. <sup>9</sup>Dept of Environmental Science, Aarhus University, Roskilde, Denmark. <sup>10</sup>Institute of Epidemiology, Helmholtz Zentrum München, Neuherberg, Germany. <sup>11</sup>Institute of Occupational, Social and Environmental Medicine, Heinrich Heine University Düsseldorf, Düsseldorf, Germany. <sup>12</sup>Institute for Risk Assessment Sciences (IRAS), Utrecht University, Utrecht, The Netherlands. <sup>13</sup>National Institute for Public Health and the Environment (RIVM), Bilthoven, The Netherlands. <sup>14</sup>Population Health Research Institute, St George's, University of London, London, UK. <sup>15</sup>Interface Demography, Dept of Sociology, Vrije Universiteit Brussel, Brussels, Belgium. <sup>16</sup>CESP, Faculté de Médecine, Université Paris-Saclay, UVSQ, Inserm UMR 1018, Villejuif, France. <sup>17</sup>Gustave Roussy, Villejuif, France. <sup>18</sup>Climate, Aarhus University Interdisciplinary Center for Climate Change, Roskilde, Denmark. <sup>19</sup>Dept of Epidemiology, Lazio Regional Health Service, ASL Roma 1, Rome, Italy. <sup>20</sup>MRC Centre for Environment and Health, School of Public Health, Imperial College London, London, UK. <sup>21</sup>UK Small Area Health Statistics Unit, Dept of Epidemiology and Biostatistics, Imperial College London, London, UK. <sup>22</sup>Centre for Environmental Health and Sustainability and School of Geography, Geology and the Environment, University of Leicester, Leicester, UK. <sup>23</sup>Swiss Tropical and Public Health Institute, Basel, Switzerland. <sup>24</sup>Dept of Hygiene, Epidemiology and Medical Statistics, Medical School, National and Kapodistrian University of Athens, Athens, Greece. <sup>25</sup>Global Centre for Clean Air Research, University of Surrey, Guildford, UK. <sup>26</sup>Institute of Epidemiology and Medical Biometry, Ulm University, Ulm, Germany. <sup>27</sup>Dept of Environmental Health, Norwegian Institute of Public Health, Oslo, Norway. <sup>28</sup>Epidemiology, Faculty of Medicine, Ludwig Maximilians Universität München, Munich, Germany. <sup>29</sup>Cluster for Health Services Research, Norwegian Institute of Public Health, Oslo, Norway. <sup>30</sup>Dept of Public Health, Environment Occupation and Health, Danish Ramazzini Centre, Aarhus University, Aarhus, Denmark. <sup>31</sup>Center for Epidemiological Research, Nykøbing F Hospital, Nykøbing F, Denmark.

**Correspondence:** Zorana Jovanovic Andersen, Dept of Public Health, University of Copenhagen, Øster Farimagsgade 5, 1014 Copenhagen, Denmark. E-mail: zorana.andersen@sund.ku.dk.

@ERSpublications

**Long-term exposure to air pollution, especially from fossil fuel combustion sources such as motorised traffic, is associated with the development of asthma in adults, even at levels below the current EU and US limit values and possibly WHO guidelines** <https://bit.ly/2QW5yA7>

**Cite this article as:** Liu S, Jørgensen JT, Ljungman P, *et al.* Long-term exposure to low-level air pollution and incidence of asthma: the ELAPSE project. *Eur Respir J* 2021; 57: 2003099 [https://doi.org/10.1183/13993003.030992020].

This single-page version can be shared freely online.

#### ABSTRACT

**Background:** Long-term exposure to ambient air pollution has been linked to childhood-onset asthma, although evidence is still insufficient. Within the multicentre project Effects of Low-Level Air Pollution: A Study in Europe (ELAPSE), we examined the associations of long-term exposures to particulate matter with a diameter  $<2.5\ \mu\text{m}$  ( $\text{PM}_{2.5}$ ), nitrogen dioxide ( $\text{NO}_2$ ) and black carbon (BC) with asthma incidence in adults.

**Methods:** We pooled data from three cohorts in Denmark and Sweden with information on asthma hospital diagnoses. The average concentrations of air pollutants in 2010 were modelled by hybrid land-use regression models at participants' baseline residential addresses. Associations of air pollution exposures with asthma incidence were explored with Cox proportional hazard models, adjusting for potential confounders.

**Results:** Of 98 326 participants, 1965 developed asthma during a mean follow-up of 16.6 years. We observed associations in fully adjusted models with hazard ratios of 1.22 (95% CI 1.04–1.43) per  $5\ \mu\text{g}\cdot\text{m}^{-3}$  for  $\text{PM}_{2.5}$ , 1.17 (95% CI 1.10–1.25) per  $10\ \mu\text{g}\cdot\text{m}^{-3}$  for  $\text{NO}_2$  and 1.15 (95% CI 1.08–1.23) per  $0.5\times 10^{-5}\ \text{m}^{-1}$  for BC. Hazard ratios were larger in cohort subsets with exposure levels below the European Union and US limit values and possibly World Health Organization guidelines for  $\text{PM}_{2.5}$  and  $\text{NO}_2$ .  $\text{NO}_2$  and BC estimates remained unchanged in two-pollutant models with  $\text{PM}_{2.5}$ , whereas  $\text{PM}_{2.5}$  estimates were attenuated to unity. The concentration–response curves showed no evidence of a threshold.

**Conclusions:** Long-term exposure to air pollution, especially from fossil fuel combustion sources such as motorised traffic, was associated with adult-onset asthma, even at levels below the current limit values.
